# Supplementary material for: Towards Establishment of a Rice Stress Response Interactome
Source: PubMed Central journal article supplement (PMC3077385; doi:10.1371/journal.pgen.1002020), 2011-04-14

# Figure S2

## A Positive interactions with controls

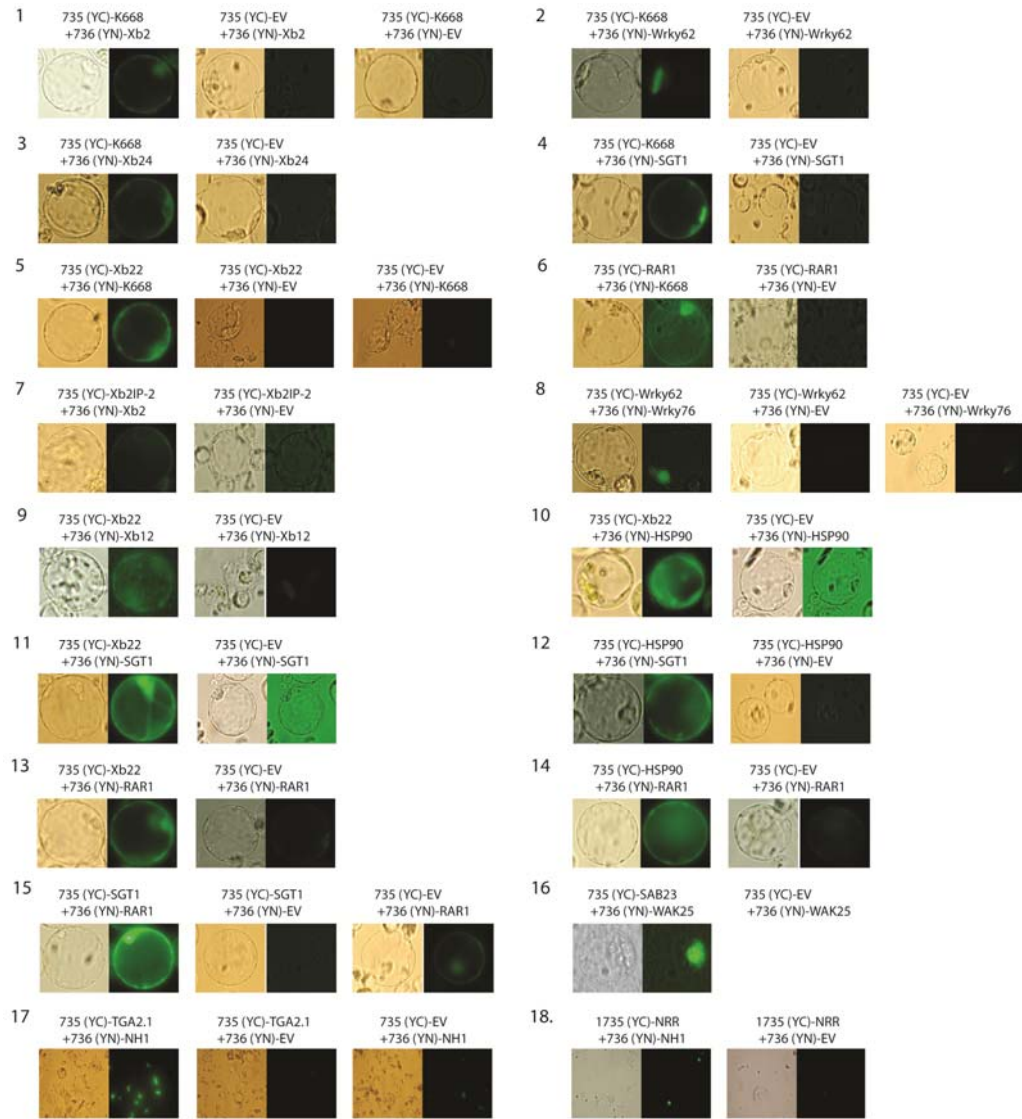

## B Representative negative interactions

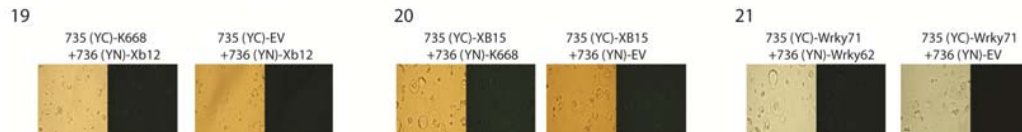

Supplement: pgen.1002020.s002.pdf [file pgen.1002020.s002.pdf]
