# Supplementary material for: Towards Establishment of a Rice Stress Response Interactome
Source: PubMed Central journal article supplement (PMC3077385; doi:10.1371/journal.pgen.1002020), 2011-04-14

Figure S4

A

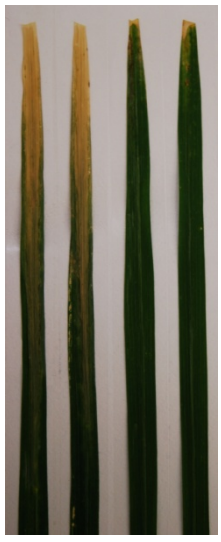

|               |             |           |
|---------------|-------------|-----------|
|               | <b>WT-3</b> | <b>10</b> |
| <i>Osmpk5</i> | +           | RNAi      |
| <i>Osmpk5</i> | +           | RNAi      |

B

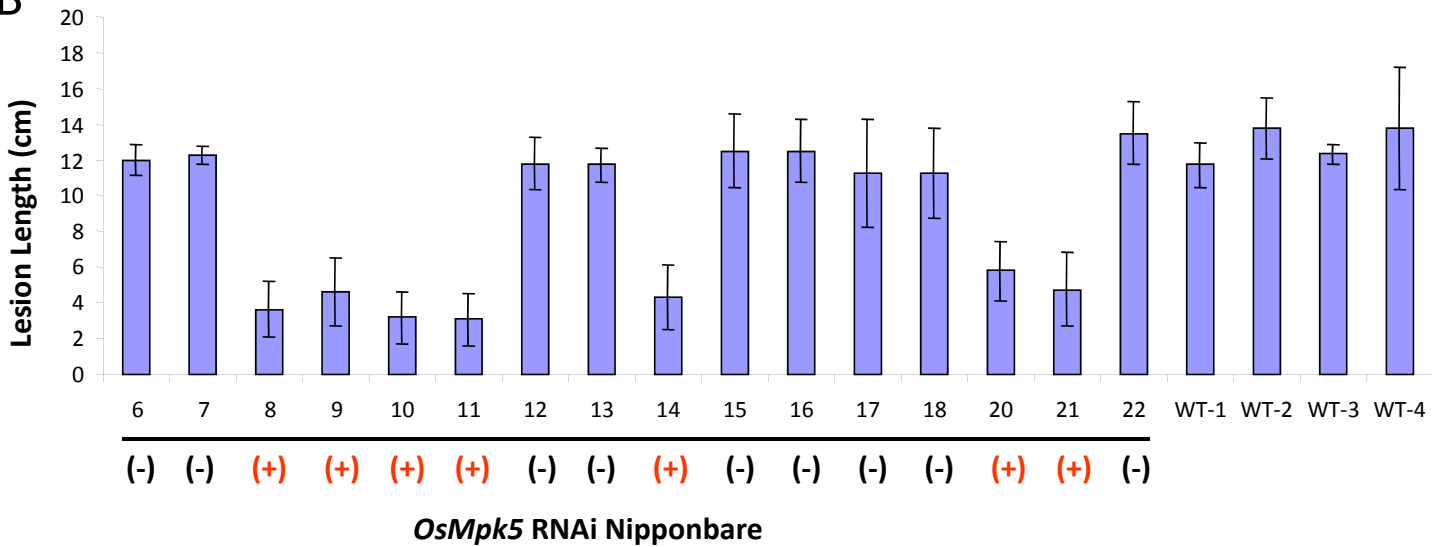

C

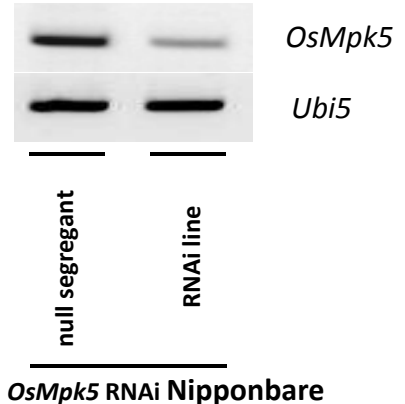

Supplement: pgen.1002020.s004.pdf [file pgen.1002020.s004.pdf]
