# Supplementary material for: Towards Establishment of a Rice Stress Response Interactome
Source: PubMed Central journal article supplement (PMC3077385; doi:10.1371/journal.pgen.1002020), 2011-04-14

Figure S5

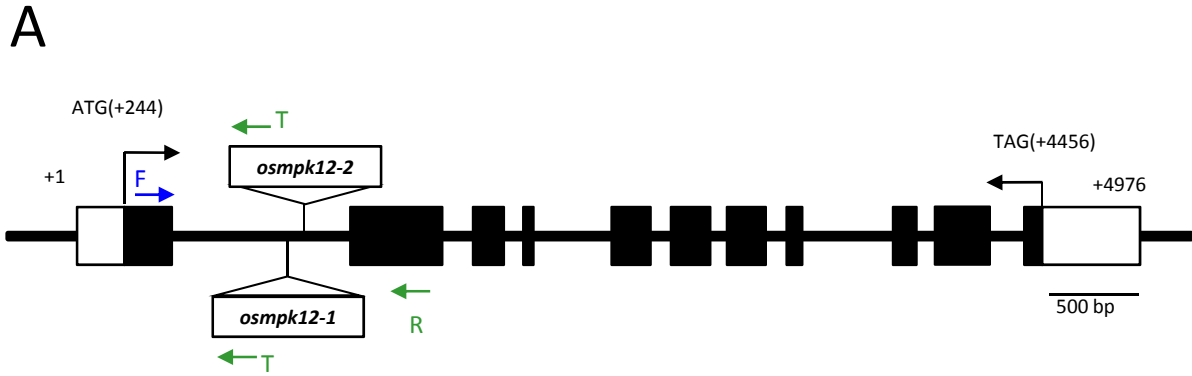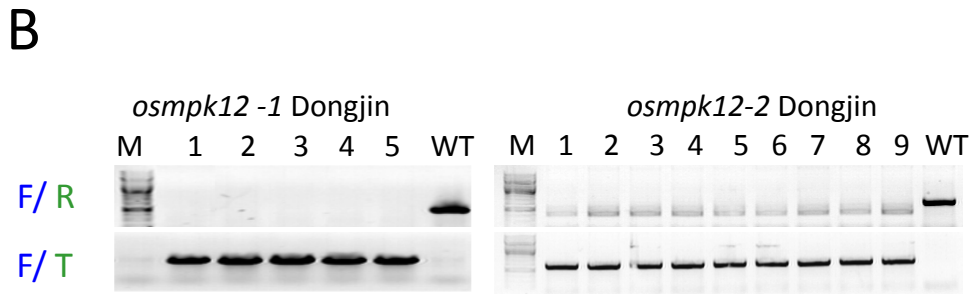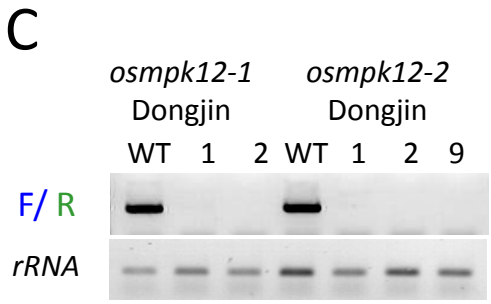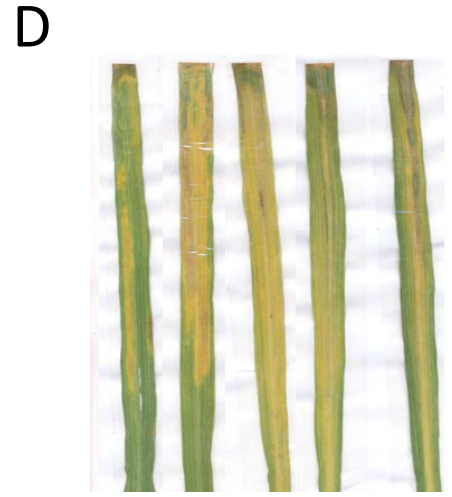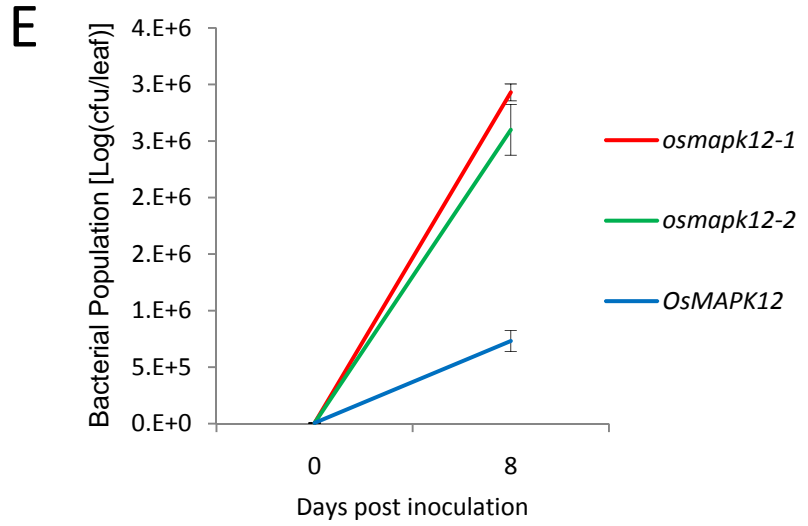

Supplement: pgen.1002020.s005.pdf [file pgen.1002020.s005.pdf]
