# Supplementary material for: Towards Establishment of a Rice Stress Response Interactome
Source: PubMed Central journal article supplement (PMC3077385; doi:10.1371/journal.pgen.1002020), 2011-04-14

Figure S7

A

*Sab23 ox / Xa21 F<sub>3</sub>*

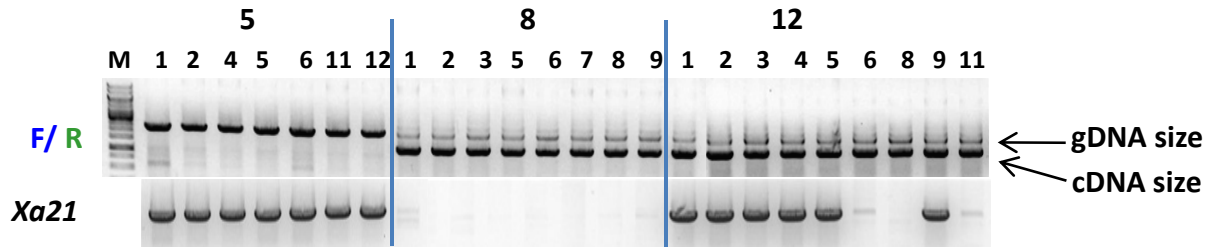

B

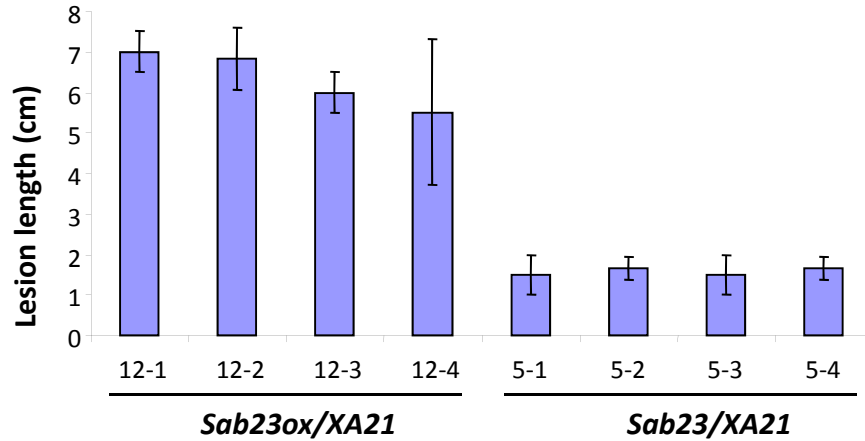

C

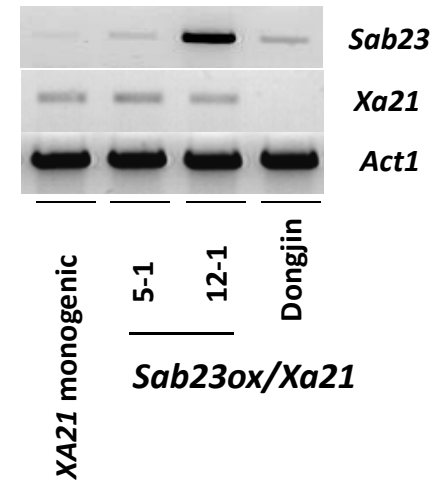

Supplement: pgen.1002020.s007.pdf [file pgen.1002020.s007.pdf]
