# Supplementary material for: Towards Establishment of a Rice Stress Response Interactome
Source: PubMed Central journal article supplement (PMC3077385; doi:10.1371/journal.pgen.1002020), 2011-04-14

Figure S8

A

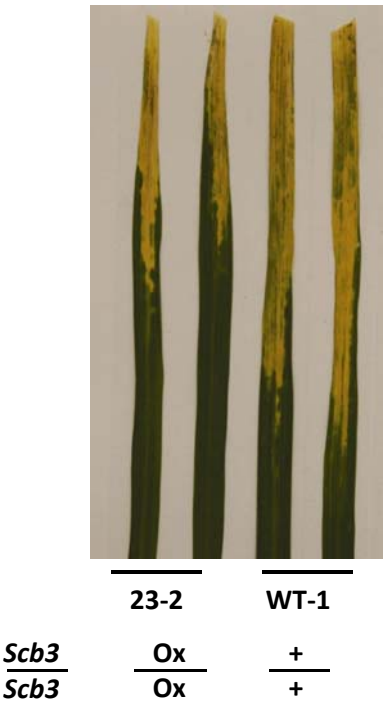

B

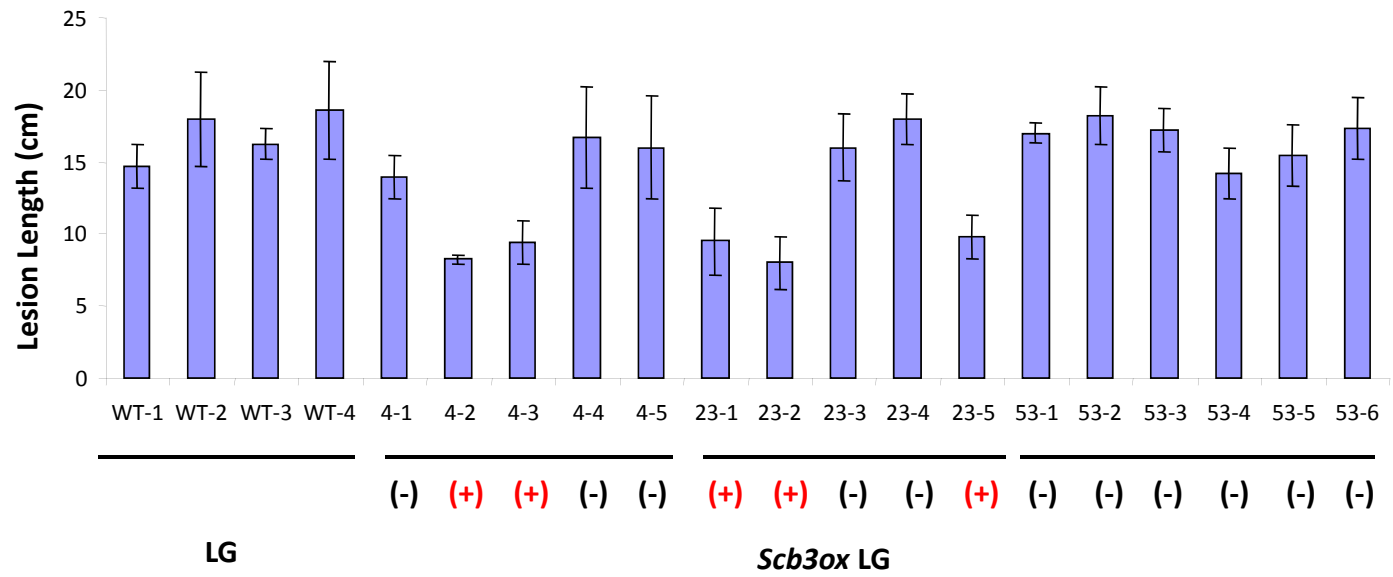

C

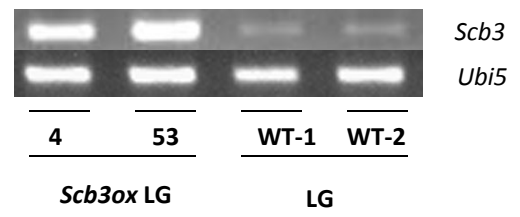

Supplement: pgen.1002020.s008.pdf [file pgen.1002020.s008.pdf]
