# Supplementary material for: Towards Establishment of a Rice Stress Response Interactome
Source: PubMed Central journal article supplement (PMC3077385; doi:10.1371/journal.pgen.1002020), 2011-04-14
Supplement: pgen.1002020.s009.pdf [file pgen.1002020.s009.pdf]

Figure S9

A

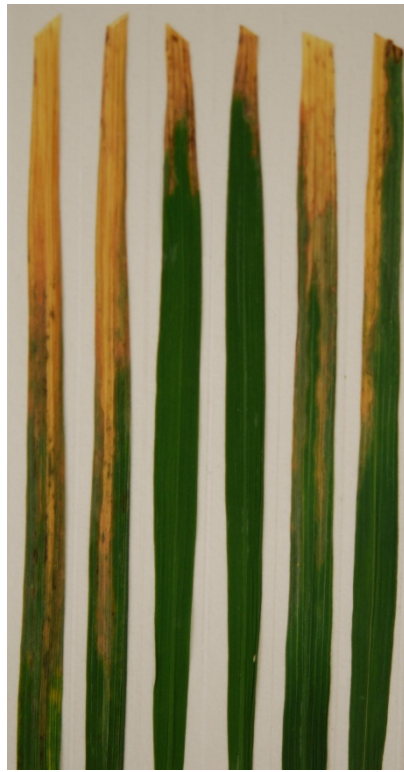

Kitakke      Kit-XA21      2-6

|               |             |   |   |   |   |      |   |
|---------------|-------------|---|---|---|---|------|---|
| <i>SnRk1a</i> | <i>Xa21</i> | + | - | + | + | RNAi | + |
| <i>SnRk1a</i> | <i>Xa21</i> | + | - | + | + | RNAi | + |

B

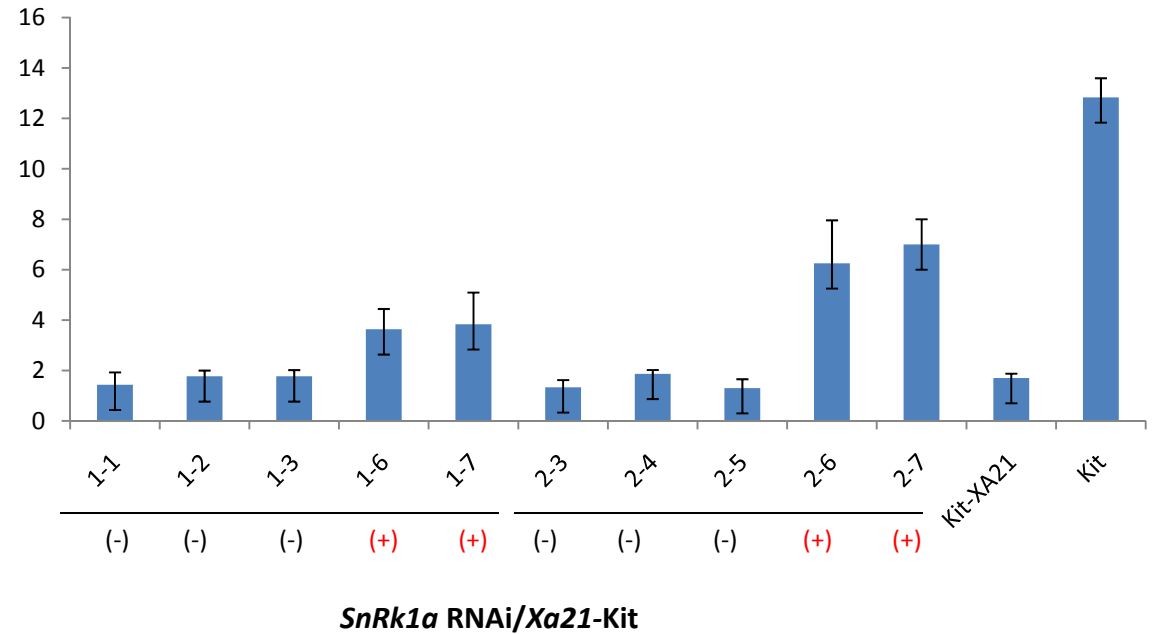

C

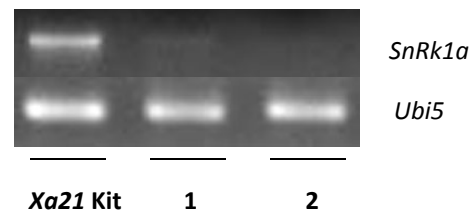

Xa21 Kit      1      2

*SnRk1a* RNAi/*Xa21*-Kit
