# Supplementary material for: Towards Establishment of a Rice Stress Response Interactome
Source: PubMed Central journal article supplement (PMC3077385; doi:10.1371/journal.pgen.1002020), 2011-04-14

Figure S12

**A**

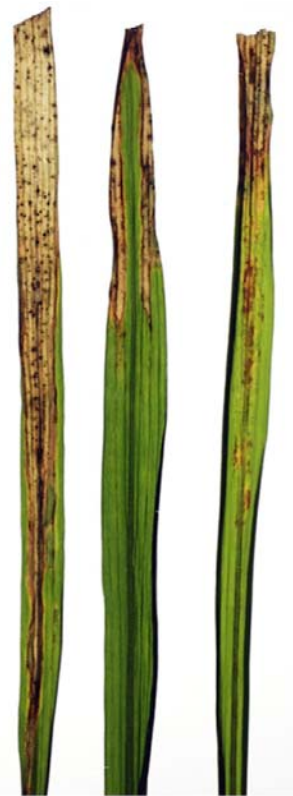

Kit      4-3-1      2-4-1

|                |   |    |    |
|----------------|---|----|----|
| <i>OsErbp1</i> | + | Ox | Ox |
| <i>OsErbp1</i> | + | Ox | Ox |

**B**

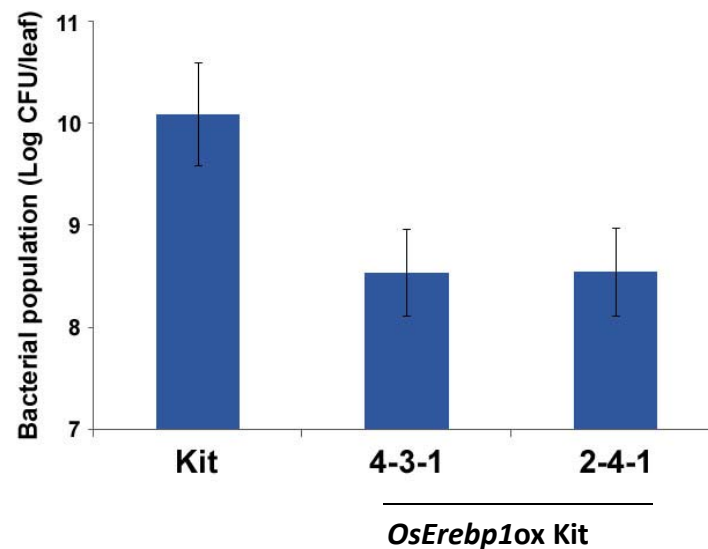

**C**

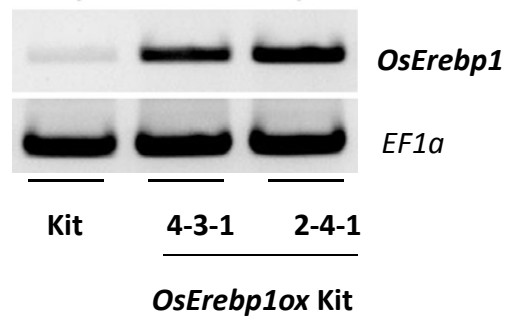

Supplement: pgen.1002020.s012.pdf [file pgen.1002020.s012.pdf]
