# Supplementary material for: Towards Establishment of a Rice Stress Response Interactome
Source: PLoS Genet. 2011 Apr 14;7(4):e1002020. doi: 10.1371/journal.pgen.1002020 (PMC3077385; doi:10.1371/journal.pgen.1002020)
Supplement: Table S8 — Degee in Different Abiotic Gene Exprssion Networks of Interactome Transcripts. (XLSX) [file pgen.1002020.s021.xlsx]

## Sheet: Sheet1
Table S8. Degee in Different Abiotic Gene Exprssion Networks of Interactome Transcripts
LOC_ID	Name	Phenotype (Xoo unless otherwise specified)	Genotype	PCC > |0.5|	PCC > 0.5	PCC <-0.5	PCC > |0.6|	PCC > 0.6	PCC < -0.6
LOC_Os01g03940	NRR	- regulator	XA21/no XA21	1	0	1	0	0	0
LOC_Os01g56470	XB24	- regulator	XA21/no XA21	7	1	6	1	0	1
LOC_Os03g60650	XB15	- regulator	XA21	18	13	5	7	7	0
LOC_Os09g25070	OsWRKY62	- regulator	XA21/no XA21	19	15	4	10	8	2
LOC_Os10g38950	OsMPK6	- regulator	no XA21	2	2	0	0	0	0
LOC_Os03g17700	OsMPK5	- regulator, no sub	no XA21	17	13	4	9	8	1
LOC_Os09g25060	OsWRKY76	- regulator, no sub	XA21	23	18	5	11	9	2
LOC_Os12g32980	SAB23	- regulator, no sub	XA21/no XA21	26	9	17	17	3	14
LOC_Os01g09800	NH1	+ regulator	no XA21	11	10	1	6	5	1
LOC_Os01g12900	OsRac1	+ regulator	no XA21	15	2	13	5	0	5
LOC_Os02g08440	OsWRKY71	+ regulator	no XA21	10	10	0	8	8	0
LOC_Os02g33180	RAR1	+ regulator	XA21	29	7	22	18	5	13
LOC_Os02g54160	OsEREBP1	+ regulator	no XA21	11	5	6	2	1	1
LOC_Os05g45420	SnRK1A	+ regulator	XA21	6	1	5	0	0	0
LOC_Os06g49430	OsMPK12	+ regulator	no XA21	19	2	17	5	0	5
LOC_Os07g48820	TGA2.1	+ regulator	no XA21	13	11	2	9	8	1
LOC_Os08g34740	SGT1	+ regulator	no XA21	0	0	0	0	0	0
LOC_Os03g12470	WAK25	+ regulator, no sub	XA21	15	5	10	2	0	2
LOC_Os03g14120	SCB3	+ regulator, no sub	no XA21	8	4	4	1	0	1
LOC_Os06g44010	OsWRKY28	no disease phen.	no XA21	12	11	1	2	2	0
LOC_Os08g05560	XB11IP-2	no disease phen.	no XA21	14	6	8	3	2	1
LOC_Os11g36070	XB11IP-1	no disease phen.	no XA21	3	0	3	0	0	0
LOC_Os01g47530	OsMPK8	no disease phen.	XA21	4	4	0	0	0	0
LOC_Os11g06410	SAB18	no disease phenotype, - sub	no XA21	4	2	2	1	1	0
LOC_Os12g06640	SAB22	no disease phenotype, no sub	no XA21	0	0	0	0	0	0
LOC_Os04g58890	SAB9	no sub	Kit	6	6	0	2	2	0
LOC_Os07g37240	SAB16	no sub	Kit	28	18	10	21	17	4
LOC_Os05g02130	XB3	Not in PCC Net
LOC_Os08g44820	GIP20	Not in PCC Net
LOC_Os01g64020	rLG2	Not in PCC Net
LOC_Os05g49700	XB12IP-1	Not in PCC Net
LOC_Os11g04390	NRRIP-3	Not in PCC Net
LOC_Os03g08550	PBZ1IP-1	Not in PCC Net
LOC_Os10g40650	SCB7	Not in PCC Net
LOC_Os01g03820	XB11	Not in PCC Net
LOC_Os11g08670	SCB10	Not in PCC Net
LOC_Os11g01550	XB22IP-1	Not in PCC Net
LOC_Os09g02710	GIP18	Phenotype Untested		37	22	15	23	17	6
LOC_Os03g57220	GIP1	Phenotype Untested		36	23	13	26	19	7
LOC_Os05g09020	OsWRKY67	Phenotype Untested		35	25	10	19	16	3
LOC_Os05g07860	SAB10	Phenotype Untested		34	23	11	27	20	7
LOC_Os04g53680	NRRIP-1	Phenotype Untested		33	21	12	26	18	8
LOC_Os05g33620	SAB12	Phenotype Untested		33	21	12	26	18	8
LOC_Os11g47970	SAB21	Phenotype Untested		33	22	11	21	17	4
LOC_Os07g07540	XB22	Phenotype Untested		32	21	11	24	18	6
LOC_Os10g42700	XB12	Phenotype Untested		32	20	12	21	17	4
LOC_Os05g30500	NRRH1	Phenotype Untested		31	23	8	21	19	2
LOC_Os01g32460	NRRH2	Phenotype Untested		30	21	9	23	18	5
LOC_Os03g10180	SCB2	Phenotype Untested		30	21	9	21	16	5
LOC_Os04g56400	SAB8	Phenotype Untested		29	19	10	20	17	3
LOC_Os01g14810	LOC_Os01g14810	Phenotype Untested		28	21	7	22	17	5
LOC_Os01g49290	RACK1	Phenotype Untested		27	6	21	21	3	18
LOC_Os01g31690	SAB4	Phenotype Untested		26	19	7	20	16	4
LOC_Os01g24880	SAB2	Phenotype Untested		25	20	5	10	9	1
LOC_Os06g17280	XB2	Phenotype Untested		25	17	8	13	12	1
LOC_Os03g45280	PBZ1IP-2	Phenotype Untested		24	19	5	7	6	1
LOC_Os01g32660	OsMKK6	Phenotype Untested		23	7	16	15	3	12
LOC_Os07g32460	NRRIP-2	Phenotype Untested		23	6	17	10	2	8
LOC_Os10g28610	KIP1	Phenotype Untested		21	6	15	6	2	4
LOC_Os06g10750	SAB15	Phenotype Untested		19	15	4	8	7	1
LOC_Os09g34860	SAB17	Phenotype Untested		18	15	3	10	9	1
LOC_Os11g06650	SAB19	Phenotype Untested		18	2	16	3	1	2
LOC_Os02g20360	GIP13	Phenotype Untested		17	14	3	5	5	0
LOC_Os12g36180	XB21	Phenotype Untested		17	5	12	5	1	4
LOC_Os03g20310	TGA2.2	Phenotype Untested		15	14	1	11	10	1
LOC_Os01g32380	NRRH3	Phenotype Untested		14	5	9	1	0	1
LOC_Os01g47760	GRNL1	Phenotype Untested		14	13	1	8	7	1
LOC_Os06g03810	SAB14	Phenotype Untested		14	12	2	11	11	0
LOC_Os05g48930	GRNL2	Phenotype Untested		13	10	3	8	8	0
LOC_Os01g56200	NH2	Phenotype Untested		12	10	2	3	3	0
LOC_Os02g57200	LOC_Os02g57200	Phenotype Untested		11	4	7	3	1	2
LOC_Os01g14950	SAB1	Phenotype Untested		9	2	7	4	2	2
LOC_Os01g17260	TGA2.3	Phenotype Untested		9	3	6	3	0	3
LOC_Os10g39200	GIP23	Phenotype Untested		9	7	2	3	3	0
LOC_Os12g36880	PBZ1	Phenotype Untested		9	7	2	0	0	0
LOC_Os09g27050	SCB6	Phenotype Untested		8	7	1	1	0	1
LOC_Os11g04880	SCB8	Phenotype Untested		7	6	1	1	1	0
LOC_Os09g11460	SUB1C	untested, - sub	Kit	7	7	0	2	2	0
LOC_Os01g25820	OsRBOHB	Phenotype Untested		6	3	3	1	1	0
LOC_Os04g39090	XB12IP-2	Phenotype Untested		6	4	2	1	1	0
LOC_Os02g54600	OsMKK4	Phenotype Untested		5	4	1	1	1	0
LOC_Os02g05490	XB2IP-4	Phenotype Untested		4	4	0	0	0	0
LOC_Os04g13220	SCB4	Phenotype Untested		4	3	1	0	0	0
LOC_Os04g39560	GIP6	Phenotype Untested		3	3	0	0	0	0
LOC_Os06g46770	XB2IP-1	Phenotype Untested		3	2	1	2	2	0
LOC_Os09g30412	HSP90	Phenotype Untested		3	1	2	2	1	1
LOC_Os03g46570	SAB6	Phenotype Untested		2	1	1	0	0	0
LOC_Os03g46770	SAB7	Phenotype Untested		2	2	0	2	2	0
LOC_Os05g28300	XB12IP-5	Phenotype Untested		2	2	0	0	0	0
LOC_Os09g04810	XB2IP-3	Phenotype Untested		2	1	1	0	0	0
LOC_Os09g11480	SUB1A	Phenotype Untested		2	2	0	1	1	0
LOC_Os12g38490	TGA2.1IP-2	Phenotype Untested		2	2	0	0	0	0
LOC_Os12g43600	SAB24	Phenotype Untested		2	2	0	2	2	0
LOC_Os06g06090	OsMPK1	Phenotype Untested		1	0	1	0	0	0
LOC_Os07g39620	TGA2.1IP-1	Phenotype Untested		1	0	1	0	0	0
LOC_Os02g54120	GIP11	Phenotype Untested		0	0	0	0	0	0
LOC_Os03g52594	GIP9	Phenotype Untested		0	0	0	0	0	0
LOC_Os04g55480	XB2IP-2	Phenotype Untested		0	0	0	0	0	0
LOC_Os11g28104	SAB20	Phenotype Untested		0	0	0	0	0	0
LOC_Os11g36180	XA21	Phenotype Untested		0	0	0	0	0	0
